# Supplementary material for: Physiological responses to hypersalinity correspond to nursery ground usage in two inshore shark species (Mustelus antarcticus & Galeorhinus galeus)
Source: Oxford University Press journal article supplement (doi:10.1242/jeb.139964), 2016-01-01
Supplement: jeb139964supp.pdf [file jeb139964supp.pdf]

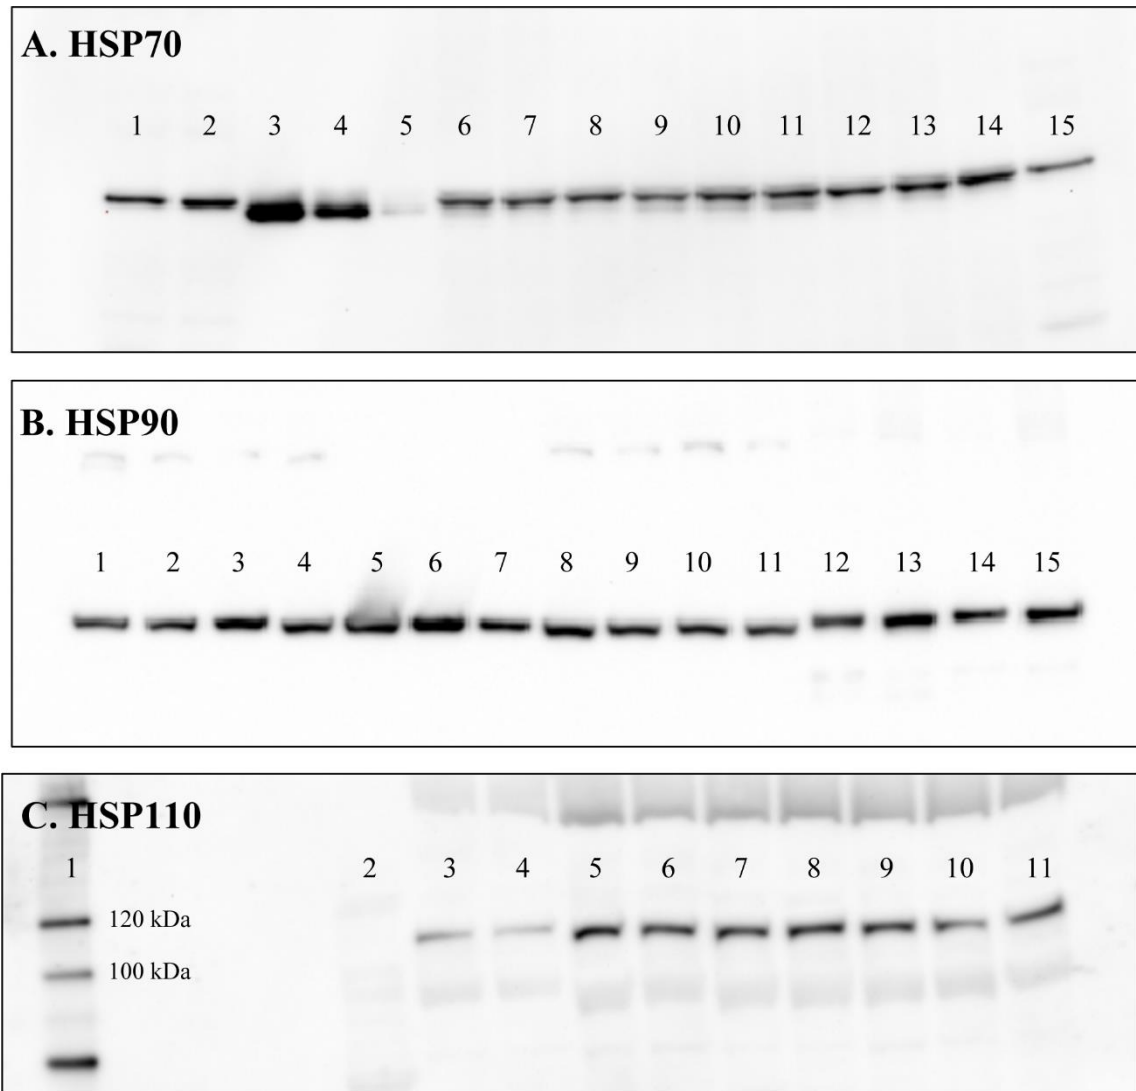

**Figure S1:** Representative western blot images for the heterologous antibodies (A) HSP70 (polyclonal rabbit affinity purified; AS05 083A, Agrisera) (B) HSP90 (monoclonal mouse; SMC-107, StressMarq Biosciences) (C) HSP110 (polyclonal rabbit; SPC-195, StressMarq **Biosciences**). **A.** Lanes 1 – 2: school shark white muscle, lanes 3 – 5: 75, 30, 7.5 ng HSP70/72 recombinant rat protein (SPP-758; Enzo Life Sciences), lanes 6 – 14: gummy shark gill tissue, lane 15: school shark white muscle. **B.** Lanes 1 – 4: school shark white muscle, lanes 5 -7: 75, 30, 7.5 ng HSP90 recombinant human protein (SPP-770; Enzo Life Sciences), lanes 8 – 11: school shark white muscle, lanes 12 – 15: gummy shark gill tissue. **C.** Lane 1: MagicMark™ XP protein standard (ThermoFisher Scientific), lanes 2 – 11: school shark white muscle.

**Table S1:** Whole blood and plasma parameters (mean  $\pm$  SEM) in school sharks (*Galeorhinus galeus*), and gummy sharks (*Mustelus antarcticus*) in the time control experiment (72 h at 100% SW).

|                                              |        | Time (h)               |                        |                         |                       | Significance (p-value) |              |              |
|----------------------------------------------|--------|------------------------|------------------------|-------------------------|-----------------------|------------------------|--------------|--------------|
|                                              |        | t = 0                  | t = 24                 | t = 48                  | t = 72                | Time x Species         | Time         | Species      |
| Plasma Osmolality (mmol $\cdot$ kg $^{-1}$ ) | School | 976 $\pm$ 4.5<br>(10)  | 957 $\pm$ 10.4<br>(10) | 972 $\pm$ 11.8<br>(10)  | 964 $\pm$ 13.7<br>(4) | 0.922                  | 0.101        | 0.081        |
|                                              | Gummy  | 992 $\pm$ 2.1<br>(5)   | 961 $\pm$ 11.7<br>(5)  | 990 $\pm$ 4.1<br>(5)    | 985<br>(2)            |                        |              |              |
| Plasma Potassium (mmol $\cdot$ L $^{-1}$ )   | School | 4.4 $\pm$ 0.18<br>(10) | 4.5 $\pm$ 0.12<br>(10) | 4.86 $\pm$ 0.11<br>(10) | 4.7 $\pm$ 0.27<br>(4) | 0.095                  | <b>0.005</b> | <b>0.007</b> |
|                                              | Gummy  | 4.5 $\pm$ 0.14<br>(5)  | 5.5 $\pm$ 0.32<br>(5)  | 5.2 $\pm$ 0.37<br>(5)   | 5.4<br>(2)            |                        |              |              |
| Plasma Sodium (mmol $\cdot$ L $^{-1}$ )      | School | 307 $\pm$ 6.1<br>(10)  | 312 $\pm$ 6.5<br>(10)  | 295 $\pm$ 7.7<br>(10)   | 282 $\pm$ 15.0<br>(4) | <b>0.028</b>           | 0.122        | -            |
|                                              | Gummy  | 306 $\pm$ 8.7<br>(5)   | 325 $\pm$ 15.9<br>(5)  | 340 $\pm$ 9.5<br>(5)    | 329<br>(2)            |                        | 0.061        |              |
| Plasma Chloride (mmol $\cdot$ L $^{-1}$ )    | School | 248 $\pm$ 7.6<br>(10)  | 252 $\pm$ 3.4<br>(10)  | 251 $\pm$ 5.3<br>(10)   | 258 $\pm$ 5.4<br>(4)  | 0.899                  | 0.639        | 0.155        |
|                                              | Gummy  | 241 $\pm$ 5.9<br>(5)   | 247 $\pm$ 5.5<br>(5)   | 242 $\pm$ 3.4<br>(5)    | 244<br>(2)            |                        |              |              |
| Plasma Urea (mmol $\cdot$ L $^{-1}$ )        | School | 335 $\pm$ 8.9<br>(10)  | 370 $\pm$ 9.0<br>(10)  | 335 $\pm$ 15.6<br>(10)  | 340 $\pm$ 14.0<br>(4) | 0.090                  | 0.780        | <b>0.001</b> |
|                                              | Gummy  | 305 $\pm$ 9.5<br>(5)   | 280 $\pm$ 3.2<br>(5)   | 299 $\pm$ 3.5<br>(5)    | 268<br>(2)            |                        |              |              |
| Plasma TMAO (mmol $\cdot$ L $^{-1}$ )        | School | 71 $\pm$ 3.9<br>(10)   | 58 $\pm$ 3.6<br>(10)   | 55 $\pm$ 2.4<br>(10)    | 54 $\pm$ 2.5<br>(4)   | 0.079                  | <b>0.041</b> | <b>0.001</b> |
|                                              | Gummy  | 87 $\pm$ 10.6<br>(4)   | 75 $\pm$ 10.9<br>(4)   | 93 $\pm$ 7.0<br>(5)     | 83<br>(2)             |                        |              |              |
| Plasma Glucose (mmol $\cdot$ L $^{-1}$ )     | School | 7.9 $\pm$ 0.6<br>(10)  | 7.8 $\pm$ 0.2<br>(10)  | 8.0 $\pm$ 0.2<br>(10)   | 7.4 $\pm$ 0.1<br>(4)  | 0.073                  | 0.081        | <b>0.024</b> |
|                                              | Gummy  | 6.0 $\pm$ 0.6<br>(5)   | 4.7 $\pm$ 0.5<br>(5)   | 4.0 $\pm$ 0.4<br>(5)    | 4.3<br>(2)            |                        |              |              |
| [Hb] (g $\cdot$ L $^{-1}$ )                  | School | 33.6 $\pm$ 2.3<br>(10) | 33.4 $\pm$ 2.5<br>(10) | 28.9 $\pm$ 2.9<br>(5)   | 26.9 $\pm$ 2.2<br>(4) | 0.730                  | 0.068        | 0.228        |
|                                              | Gummy  | 36.6 $\pm$ 4.3<br>(5)  | 31.9 $\pm$ 5.1<br>(5)  | 28.4 $\pm$ 3.8<br>(5)   | 35.3<br>(2)           |                        |              |              |
| Hct (%)                                      | School | 19.1 $\pm$ 1.3<br>(10) | 16.3 $\pm$ 0.8<br>(10) | 17.3 $\pm$ 1.0<br>(10)  | 18.3 $\pm$ 1.7<br>(4) | 0.958                  | 0.467        | 0.118        |
|                                              | Gummy  | 22.6 $\pm$ 2.5<br>(5)  | 20.4 $\pm$ 3.3<br>(5)  | 22.2 $\pm$ 2.7<br>(5)   | 20.0<br>(2)           |                        |              |              |
| MCHC (g $\cdot$ L $^{-1}$ )                  | School | 176 $\pm$ 3.2<br>(10)  | 203 $\pm$ 8.1<br>(10)  | 169 $\pm$ 7.2<br>(5)    | 149 $\pm$ 10.8<br>(4) | 0.580                  | 0.115        | 0.793        |
|                                              | Gummy  | 162 $\pm$ 10.3<br>(5)  | 158 $\pm$ 8.8<br>(5)   | 127 $\pm$ 7.7<br>(5)    | 179<br>(2)            |                        |              |              |

- Samples sizes shown in brackets
- Significant p-values are bolded.
